# Supplementary material for: Sonication-assisted supramolecular nanorods of meso-diaryl-substituted porphyrins
Source: Royal Society of Chemistry journal article supplement (doi:10.1039/b713971c), 2008-01-01
Supplement: b713971c.pdf [file b713971c.pdf]

# **Sonication-assisted supramolecular nanorods of *meso*-diaryl-substituted porphyrins**

Taku Hasobe<sup>\*,a,b</sup>, Hideaki Oki<sup>a</sup>, Atula S. D. Sandanayaka<sup>a</sup>,  
and Hideyuki Murata<sup>\*,a</sup>

<sup>a</sup>School of Materials Science, Japan Advanced Institute of Science and Technology (JAIST), Nomi, Ishikawa, 923-1292, Japan

<sup>b</sup>PRESTO, Japan Science and Technology Agency (JST), 4-1-8 Honcho, Kawaguchi, 332-0012, Saitama, Japan

## Experimental Section

**Preparation of porphyrin nanoassembly.** The synthesis of H<sub>2</sub>DBuPP, H<sub>2</sub>TBuPP and H<sub>2</sub>DPP has been performed in accordance with the reported literatures.<sup>9</sup> H<sub>2</sub>TPP was purchased from Aldrich. The porphyrin nanorod was prepared by the following procedure. First, 3.5 mmol dm<sup>-3</sup> porphyrin solution was prepared in toluene. Then, the toluene solution is simply mixed with 9 times volume of acetonitrile. The final concentration is 0.35 mmol dm<sup>-3</sup> in a poor/good solvent (acetonitrile/toluene) = 9/1, v/v. With regard to the sonication system for preparation of self-assembled porphyrins, we set up an original system composed of an ultrasonic generator (AS-ONE VS-100 III) and a temperature control circulator for external open system (Yamato Scientific Co., Ltd. Cool-Line CLS 300). The solution was sonicated (45 or 28 kHz) for 30 min at 15 °C to form macroscopic self-assembled porphyrins such as rod-like structures. In all experiments, we maintained the final concentration (0.35 mmol dm<sup>-3</sup>) and temperature (15°C). It should be noted that no formation of rod-like structure is observed without sonication, and all measurements for analysis of the structures were performed quickly before occurrence of the precipitation.

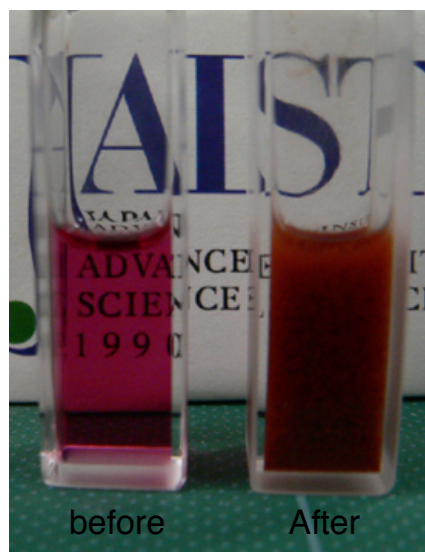

**Fig S1.** Pictures of 0.35 mmol dm<sup>-3</sup> H<sub>2</sub>DBuPP solutions (acetonitrile/toluene = 9/1, v/v) before and after sonication.

**Steady-state absorption & fluorescence and microscope measurements.** The UV-visible spectra were recorded on a Perkin Elmer LAMDA 750 spectrophotometer equipped with an integrating sphere. Fluorescence spectra were measured on Perkin Elmer LS 55 fluorescence spectrometer. TEM images were recorded using a Hitachi H-7100 transmission electron microscope. SEM images of porphyrin assemblies were

also recorded using a Hitachi S-4100 scanning electron microscope. Optical and fluorescence images were recorded using KEYENCE BZ-8000.

**Fluorescence lifetime measurement.** The time-resolved fluorescence spectra were measured by single photon counting method using a streakscope (Hamamatsu Photonics, C5680) as a detector and the laser light (Hamamatsu Photonics M10306, laser diode head, 408 nm) as an excitation source. Lifetimes were evaluated with a software attached to the equipments.

**X-ray diffraction measurement.** X-ray diffraction (XRD) measurement was carried out with a BRUKER-axs M18XHF-SRA using filtered Cu  $K_{\alpha}$  radiation. The sample for XRD analysis was prepared by drying suspension liquid over a glass substrate in air.

**Preparation of porphyrin-deposited films.** Porphyrin films were simply prepared by drop-cast method.  $\sim 1$  mL of  $0.35 \text{ mmol dm}^{-3}$  porphyrin nanorod in acetonitrile/toluene = 9/1, v/v or  $0.35 \text{ mmol dm}^{-3}$  porphyrin in toluene were dropped onto substrates (ITO, quartz plate etc, surface area:  $10 \text{ mm} \times 35 \text{ mm}$ ), and then dried in air.

**Measurement of photoelectrochemical solar cells.** An optically transparent electrode (OTE) was prepared by casting  $\text{SnO}_2$  colloidal solution (Alfa Chemicals) onto an ITO film (Sanyo Vacuum Industires Co., Ltd.) The detail procedure was reported.<sup>4,18</sup> Photoelectrochemical measurements were carried out in a standard two-compartment cell consisting of a working electrode and a Pt wire gauze counter electrode in the electrolyte. The electrolyte is  $0.5 \text{ M LiI}$  and  $0.01 \text{ M I}_2$  in acetonitrile.  $\mu\text{Autolab III}$  was used for recording photocurrent generation response and IPCE action spectrum. A collimated light beam from a  $500 \text{ W Xenon}$  lamp with a AM 1.5 filter was used for excitation of porphyrin assembly film deposited on optically transparent electrode. In the case of measurement of IPCE spectra, a monochromator (JASCO CT-25C) was introduced into the path of the excitation beam for the selected wavelength. The schematic illustration is shown in Fig. 3A for clarify.

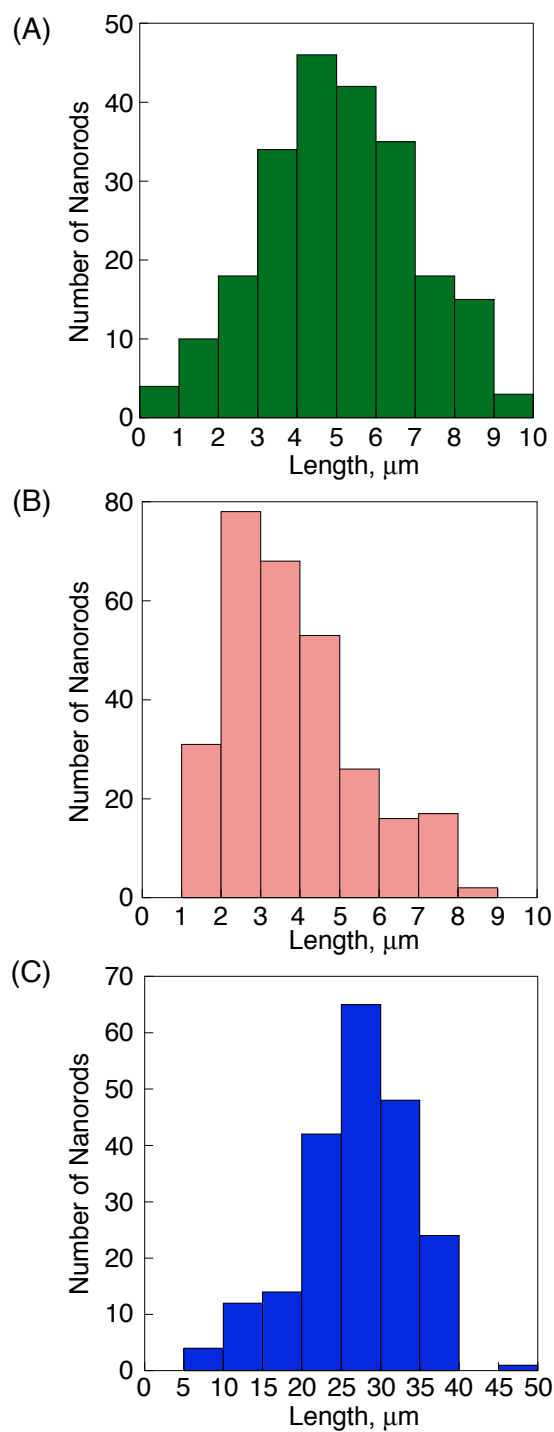

**Fig. S2** Length-distributions of (A) H<sub>2</sub>DBuPP nanorods ( $5.02 \pm 1.94 \mu\text{m}$ ), (b) H<sub>2</sub>DPP nanorods ( $3.77 \pm 1.63 \mu\text{m}$ ) and (c) H<sub>2</sub>DBuPP fibers ( $27.2 \pm 6.9 \mu\text{m}$ ).

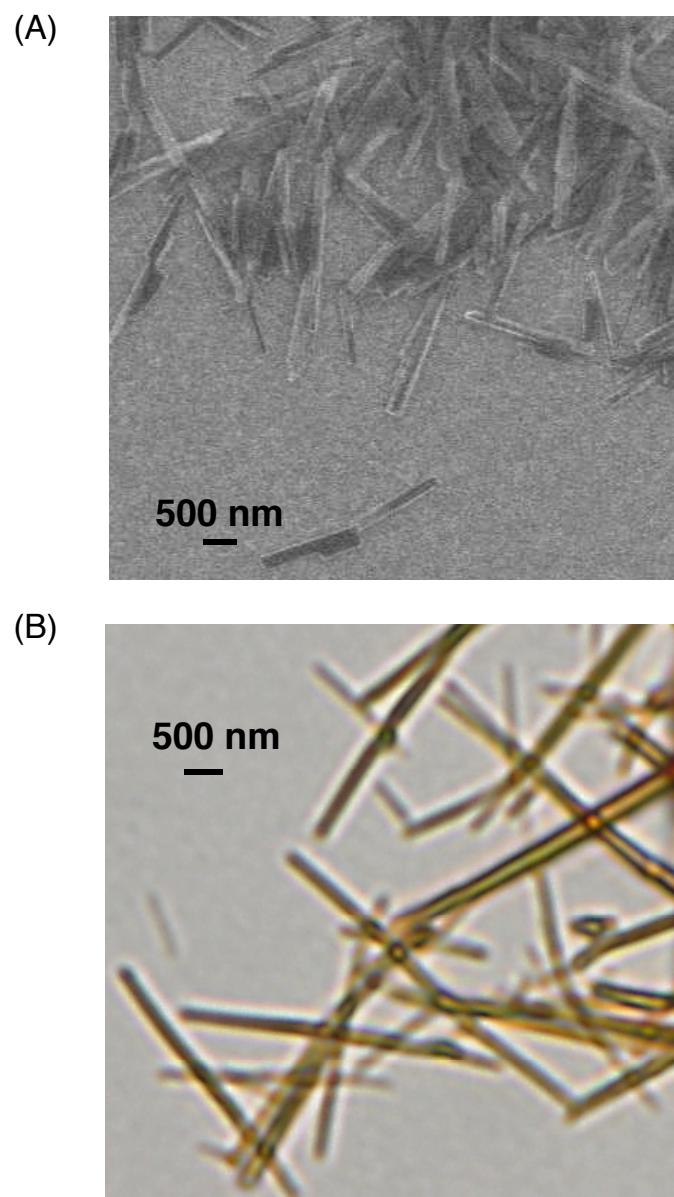

**Fig. S3** H<sub>2</sub>DBuPP nanorod structures. (A) SEM image on an ITO plate and (B) optical microscope image on a quartz plate.

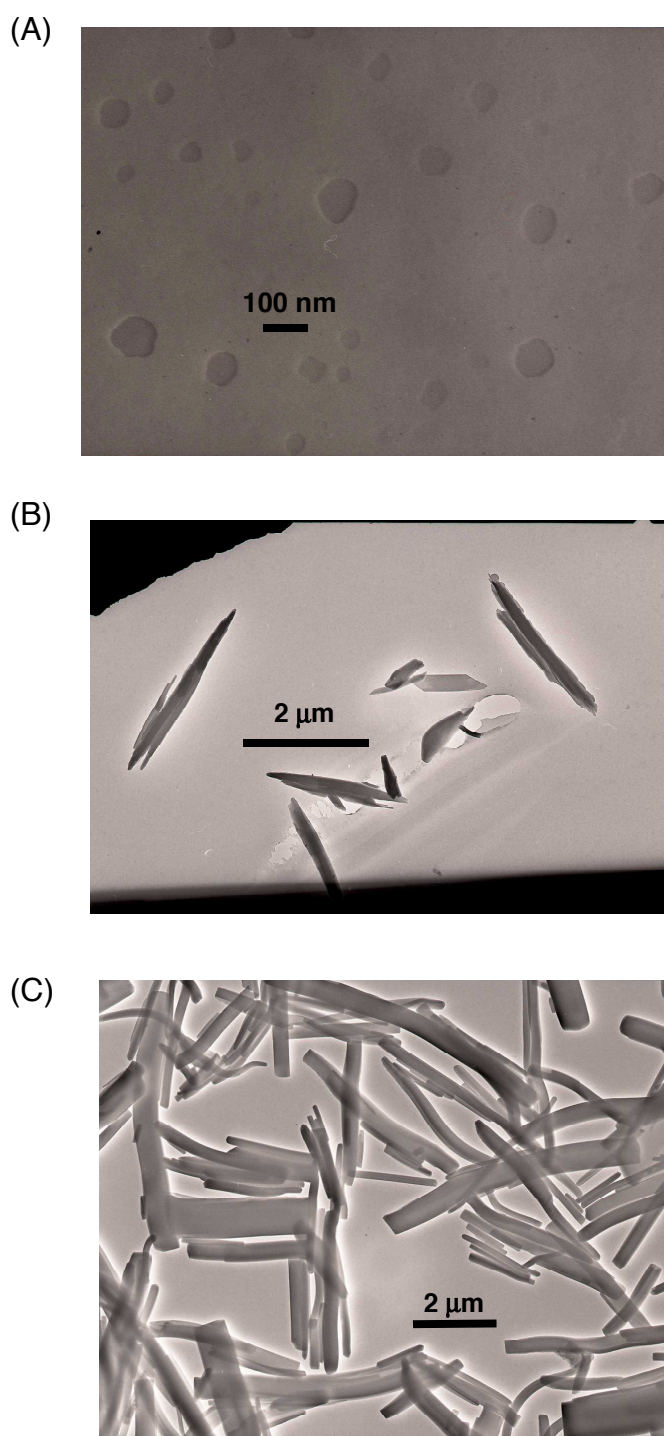

**Fig. S4** Sonication time-dependent formation of H<sub>2</sub>DBuPP assemblies by TEM analyses. (A) 3 min, (B) 10 min and (C) 20 min.

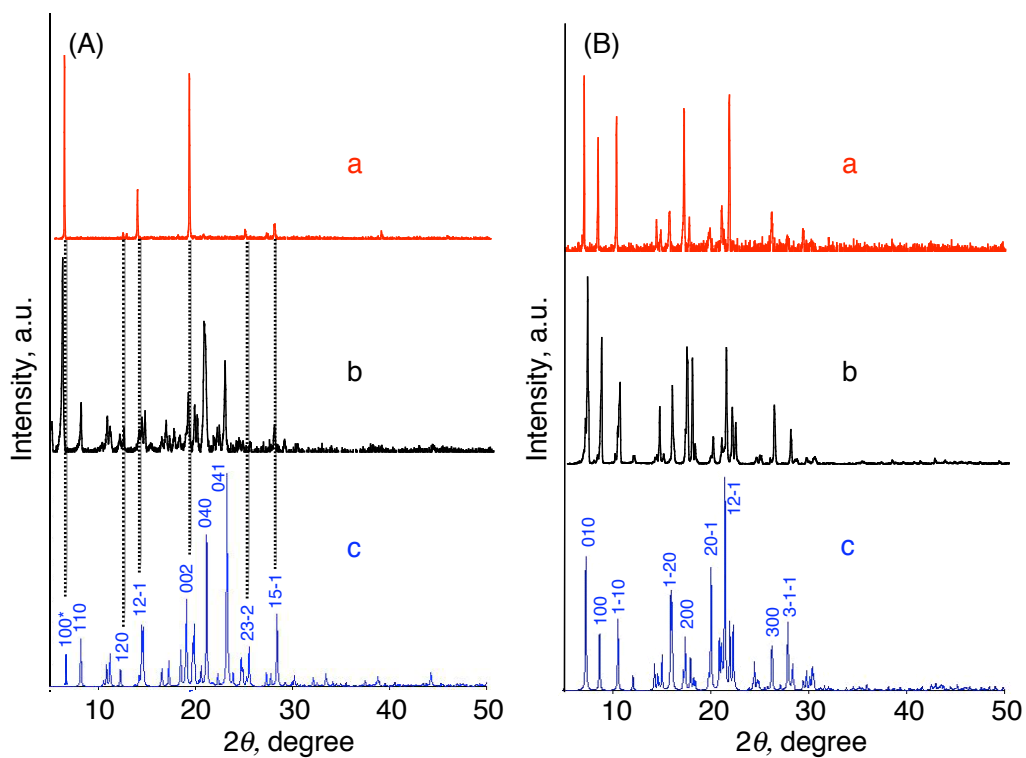

**Fig. S5** (A) XRD patterns of (a) H<sub>2</sub>DPP nanorod, (b) H<sub>2</sub>DPP starting material, and (c) simulated pattern from the crystal structure of H<sub>2</sub>DPP. (B) XRD patterns of (a) H<sub>2</sub>TPP assembly, (b) H<sub>2</sub>TPP starting material, and (c) simulated pattern from the crystal structure of H<sub>2</sub>TPP. \* x 200 magnification for clarification. The patterns *c* were analyzed by supporting materials of ref. 14 papers.

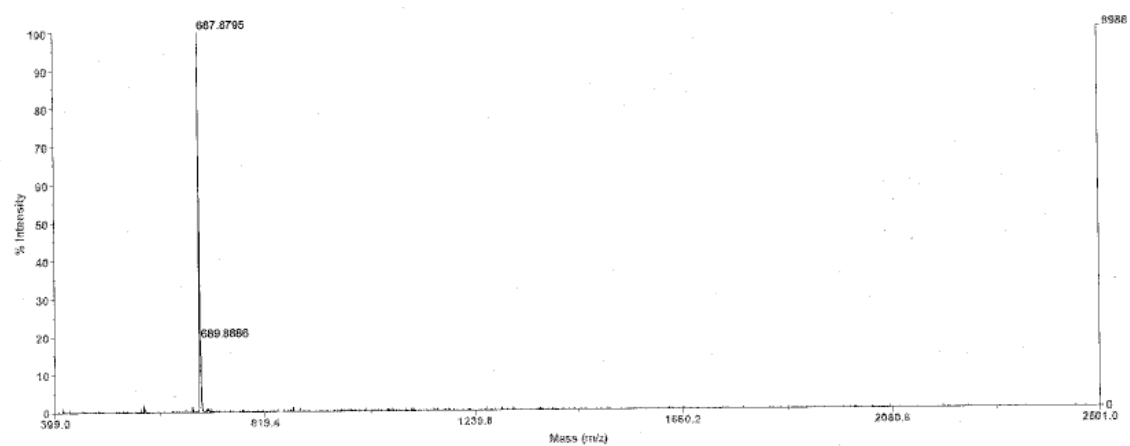

**Fig. S6** MALDI/TOF MASS analysis of H<sub>2</sub>DPP moiety after diluting H<sub>2</sub>DPP nanorods with toluene.



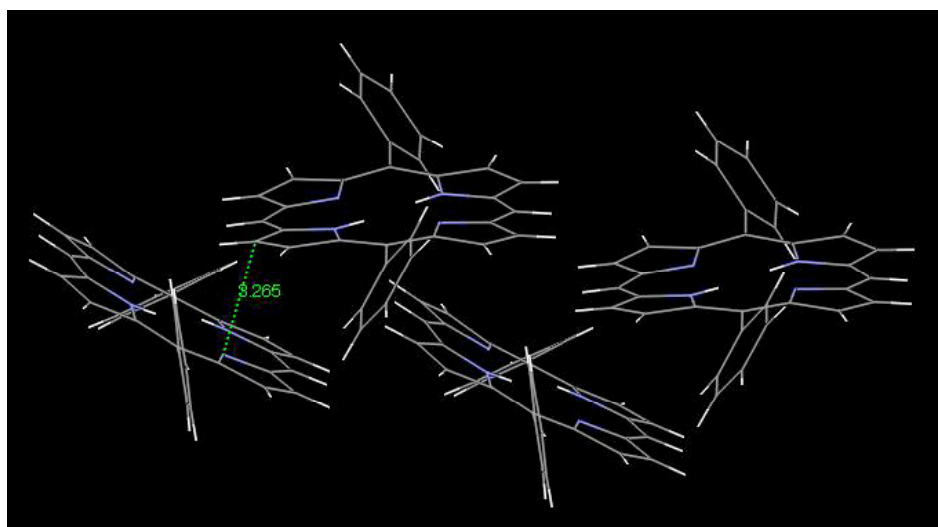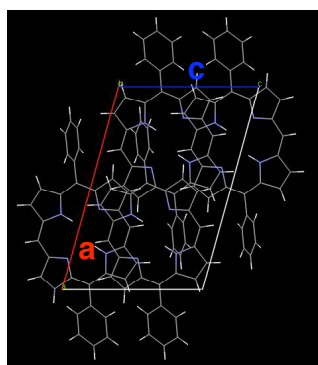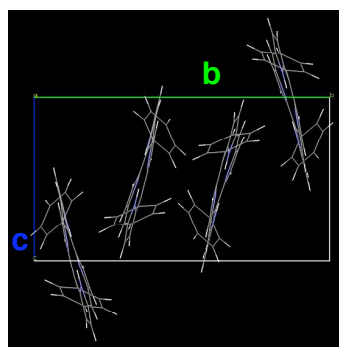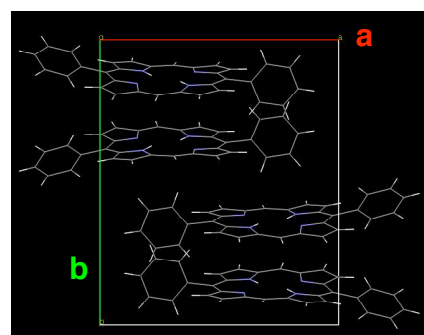

**Fig. S7** Crystal structures of H<sub>2</sub>DPP. These figures were analyzed by supporting materials of the following papers. H<sub>2</sub>DPP: A. D. Bond, N. Feeder, J. E. Redman, S. J. Teat, and J. K. M. Sanders, *Crystal Growth & Design*, 2002, **2**, 27.

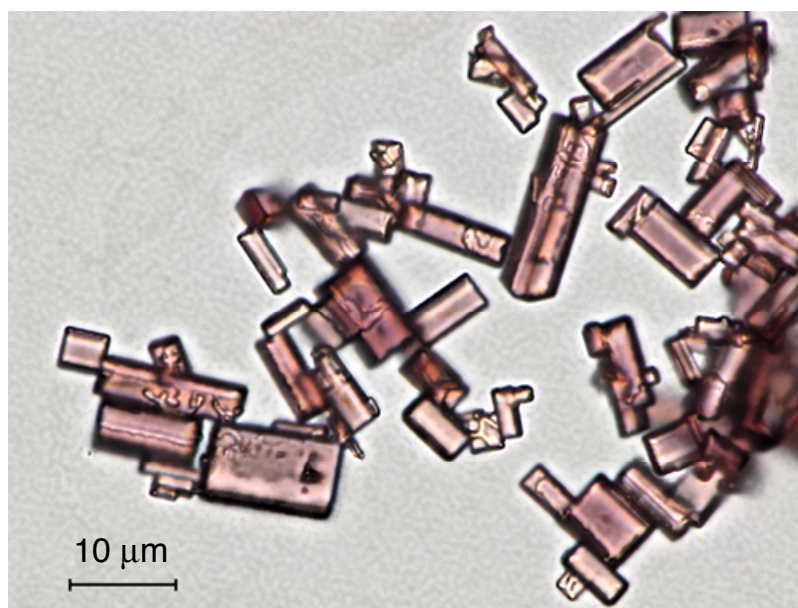

**Fig. S8** Optical microscope image of H<sub>2</sub>TBuPP assemblies after 6 days of standing.

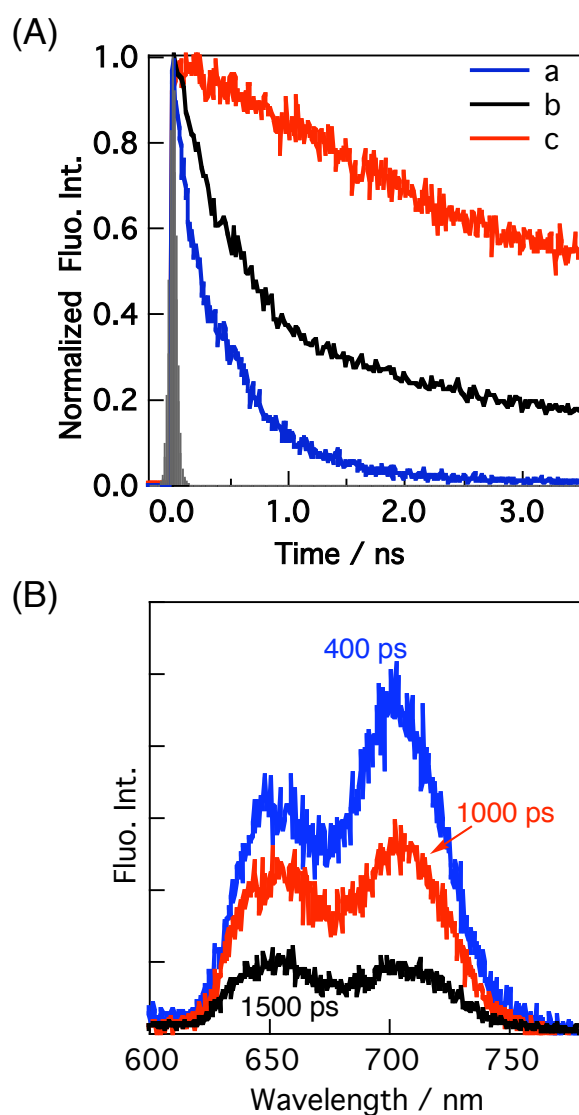

**Fig. S9** (A) Fluorescence lifetime decay profiles of (a) H<sub>2</sub>DBuPP nanorod film, (b) H<sub>2</sub>DBuPP drop-cast film on quartz plates and (c) H<sub>2</sub>DBuPP in toluene. Excitation wavelength is 408 nm and collected from 600-750 nm. (B) Time-dependent fluorescence spectra of H<sub>2</sub>DBuPP nanorod film.

**Comparison of Fluorescence Lifetimes of (a) H<sub>2</sub>DBuPP nanorod film, (b) H<sub>2</sub>DBuPP drop-cast film on quartz plates and (c) H<sub>2</sub>DBuPP in toluene.**

|                                         | $\tau_1$       | $\tau_2$      |
|-----------------------------------------|----------------|---------------|
| (a) H <sub>2</sub> DBuPP Nanorod film   | 421 ps (94%)   | 1854 ps (6%)  |
| (b) H <sub>2</sub> DBuPP drop-cast film | 750 ps (45%)   | 6023 ps (55%) |
| (c) H <sub>2</sub> DBuPP in toluene     | 9700 ps (100%) |               |

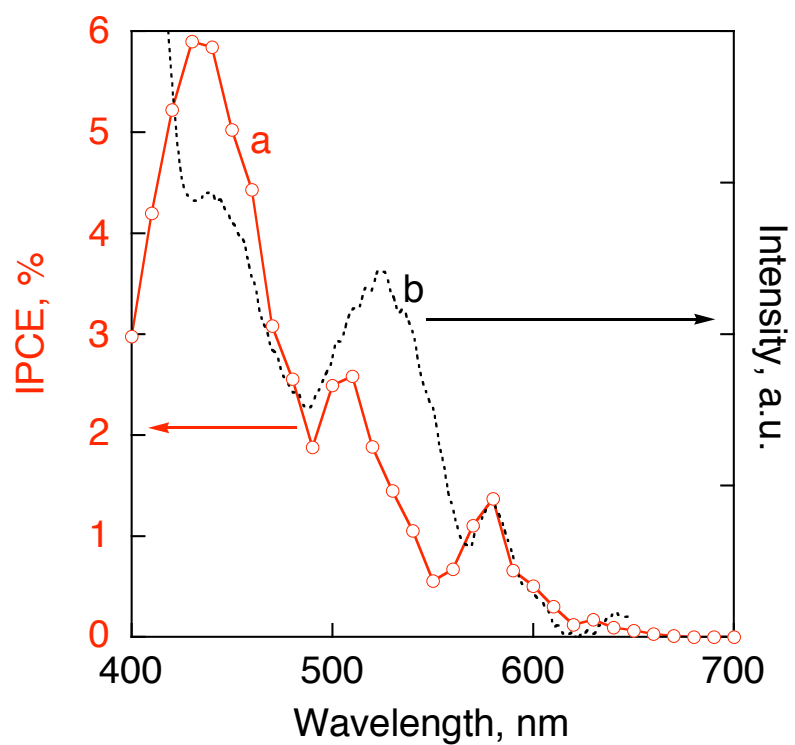

**Fig. S10** (a) Photocurrent (IPCE) action spectrum of H<sub>2</sub>DBuPP drop-cast film on an OTE. Electrolyte: 0.5 mol dm<sup>-3</sup> LiI and 0.01 mol dm<sup>-3</sup> I<sub>2</sub> in acetonitrile. (b) Excitation spectrum of H<sub>2</sub>DBuPP drop-cast film on an OTE; Observed at 680 nm.
